# Supplementary material
Source: PubMed Central journal article supplement (PMC4263651)
Supplement: 131305appendix.pdf [file 131305appendix.pdf]

**Table E1. Results of Regression Analysis**

| Measure/Threshold/<br>No. in Sample                         | Univariate Cox Model Hazard Ratio/ <i>P</i> Value |            | Survival Proportions (mo)*                |               |               |               | <i>P</i> Value                   |                                                   |
|-------------------------------------------------------------|---------------------------------------------------|------------|-------------------------------------------|---------------|---------------|---------------|----------------------------------|---------------------------------------------------|
|                                                             | Conventional                                      | CE T1W     | Method/Threshold/<br>No. in Sample        | 25th Quartile | 50th Quartile | 75th Quartile | Conventional<br>versus<br>CE T1W | Interaction<br>between<br>Method and<br>Threshold |
| <b>PFS</b>                                                  |                                                   |            |                                           |               |               |               |                                  |                                                   |
| Pretreatment<br>baseline/<15 cm <sup>3</sup> /160           | 0.58/.003                                         | 0.52/.001  | Conventional/<15 cm <sup>3</sup> /90      | 2.9           | 6.9           | 15.3          | .511                             | .701                                              |
|                                                             |                                                   |            | Conventional/≥15 cm <sup>3</sup> /70      | 2.8           | 2.1           | 7.2           |                                  |                                                   |
|                                                             |                                                   |            | CE T1W/<15 cm <sup>3</sup> /68            | 3.1           | 7.7           | 16.6          |                                  |                                                   |
|                                                             |                                                   |            | CE T1W/≥15 cm <sup>3</sup> /92            | 2.8           | 4.1           | 7.2           |                                  |                                                   |
| Posttreatment follow-up<br>(6 wk)/<7.5 cm <sup>3</sup> /131 | 0.51/.002                                         | 0.46/<.001 | Conventional/<7.5 cm <sup>3</sup> /94     | 2.3           | 5.5           | 13.5          | .624                             | .701                                              |
|                                                             |                                                   |            | Conventional/ ≥7.5 cm <sup>3</sup> /37    | 1.4           | 2.9           | 5.8           |                                  |                                                   |
|                                                             |                                                   |            | CE T1W/<7.5 cm <sup>3</sup> /82           | 2.7           | 7.2           | 13.5          |                                  |                                                   |
|                                                             |                                                   |            | CE T1W/≥7.5 cm <sup>3</sup> /49           | 1.4           | 2.7           | 5.5           |                                  |                                                   |
| Percentage change in<br>volume/≥25% (large)<br>decrease/131 | 0.86/.598                                         | 0.46/.004  | Conventional/≥25% (large)<br>decrease/111 | 2.0           | 5.4           | 10.7          | .025                             | .024                                              |
|                                                             |                                                   |            | Conventional/< 25% (small)<br>decrease/20 | 1.3           | 5.5           | 13.5          |                                  |                                                   |
|                                                             |                                                   |            | CE T1W/≥25% (large)<br>decrease/111       | 2.4           | 5.5           | 11.6          |                                  |                                                   |
|                                                             |                                                   |            | CE T1W/<25% (small)<br>decrease/20        | 0.9           | 1.3           | 4.7           |                                  |                                                   |
| <b>OS</b>                                                   |                                                   |            |                                           |               |               |               |                                  |                                                   |
| Pretreatment<br>baseline/<15 cm <sup>3</sup> /160           | 0.59/.002                                         | 0.50/.001  | Conventional/<15 cm <sup>3</sup> /90      | 6.9           | 10.3          | 22.5          | .41                              | .52                                               |
|                                                             |                                                   |            | Conventional/≥15 cm <sup>3</sup> /70      | 5.4           | 7.9           | 12.2          |                                  |                                                   |
|                                                             |                                                   |            | CE T1W/<15 cm <sup>3</sup> /68            | 8.0           | 13.1          | 24.1          |                                  |                                                   |
|                                                             |                                                   |            | CE T1W/≥15 cm <sup>3</sup> /92            | 5.1           | 7.9           | 11.9          |                                  |                                                   |

| Measure/Threshold/<br>No. in Sample                         | Univariate Cox Model Hazard Ratio/ <i>P</i> Value |            | Survival Proportions (mo)*                |               |               |               | <i>P</i> Value                   |                                                   |
|-------------------------------------------------------------|---------------------------------------------------|------------|-------------------------------------------|---------------|---------------|---------------|----------------------------------|---------------------------------------------------|
|                                                             | Conventional                                      | CE T1W     | Method/Threshold/<br>No. in Sample        | 25th Quartile | 50th Quartile | 75th Quartile | Conventional<br>versus<br>CE T1W | Interaction<br>between<br>Method and<br>Threshold |
| Posttreatment follow-up<br>(6 wk)/<7.5 cm <sup>3</sup> /142 | 0.67/.041                                         | 0.46/<.001 | Conventional/<7.5 cm <sup>3</sup> /100    | 5.0           | 9.2           | 17.8          | .35                              | .17                                               |
|                                                             |                                                   |            | Conventional/≥7.5 cm <sup>3</sup> /42     | 4.8           | 7.8           | 10.5          |                                  |                                                   |
|                                                             |                                                   |            | CE T1W/<7.5 cm <sup>3</sup> /87           | 6.4           | 12.9          | 23.3          |                                  |                                                   |
|                                                             |                                                   |            | CE T1W/≥7.5 cm <sup>3</sup> /55           | 3.8           | 6.6           | 9.7           |                                  |                                                   |
| Percentage change in<br>volume/≥25% (large)<br>decrease/142 | 0.78/.303                                         | 0.64/.053  | Conventional/≥25% (large)<br>decrease/116 | 5.4           | 9.1           | 15.0          | .057                             | .051                                              |
|                                                             |                                                   |            | Conventional/<25% (small)<br>decrease/26  | 3.8           | 7.4           | 25.9          |                                  |                                                   |
|                                                             |                                                   |            | CE T1W/≥25% (large)<br>decrease/115       | 6.1           | 9.4           | 16.1          |                                  |                                                   |
|                                                             |                                                   |            | CE T1W/<25% (small)<br>decrease/27        | 3.2           | 6.5           | 10.4          |                                  |                                                   |

Note.—Information from the BRAIN trial (study sponsor identification, AVF3708g; clinical trial registration no. NCT00345163). CE T1W = CE T1-weighted subtraction map method.

\* The data for the 25th, 50th, and 75th quartiles refer to the time to the quartile (25th quartile, 75th quartile) and the median (50th quartile) survival from the population (eg, 25th quartile refers to 25th quartile of the population that did not have progression [PFS] or had not expired [OS]). Data in the 25th, 50th, and 75th quartile columns refer to the time it takes to reach this proportion of survival (eg, values in the 50th quartile column refer to median survival for that cohort of patients).
